# Supplementary material
Source: PubMed Central journal article supplement (PMC5110059)

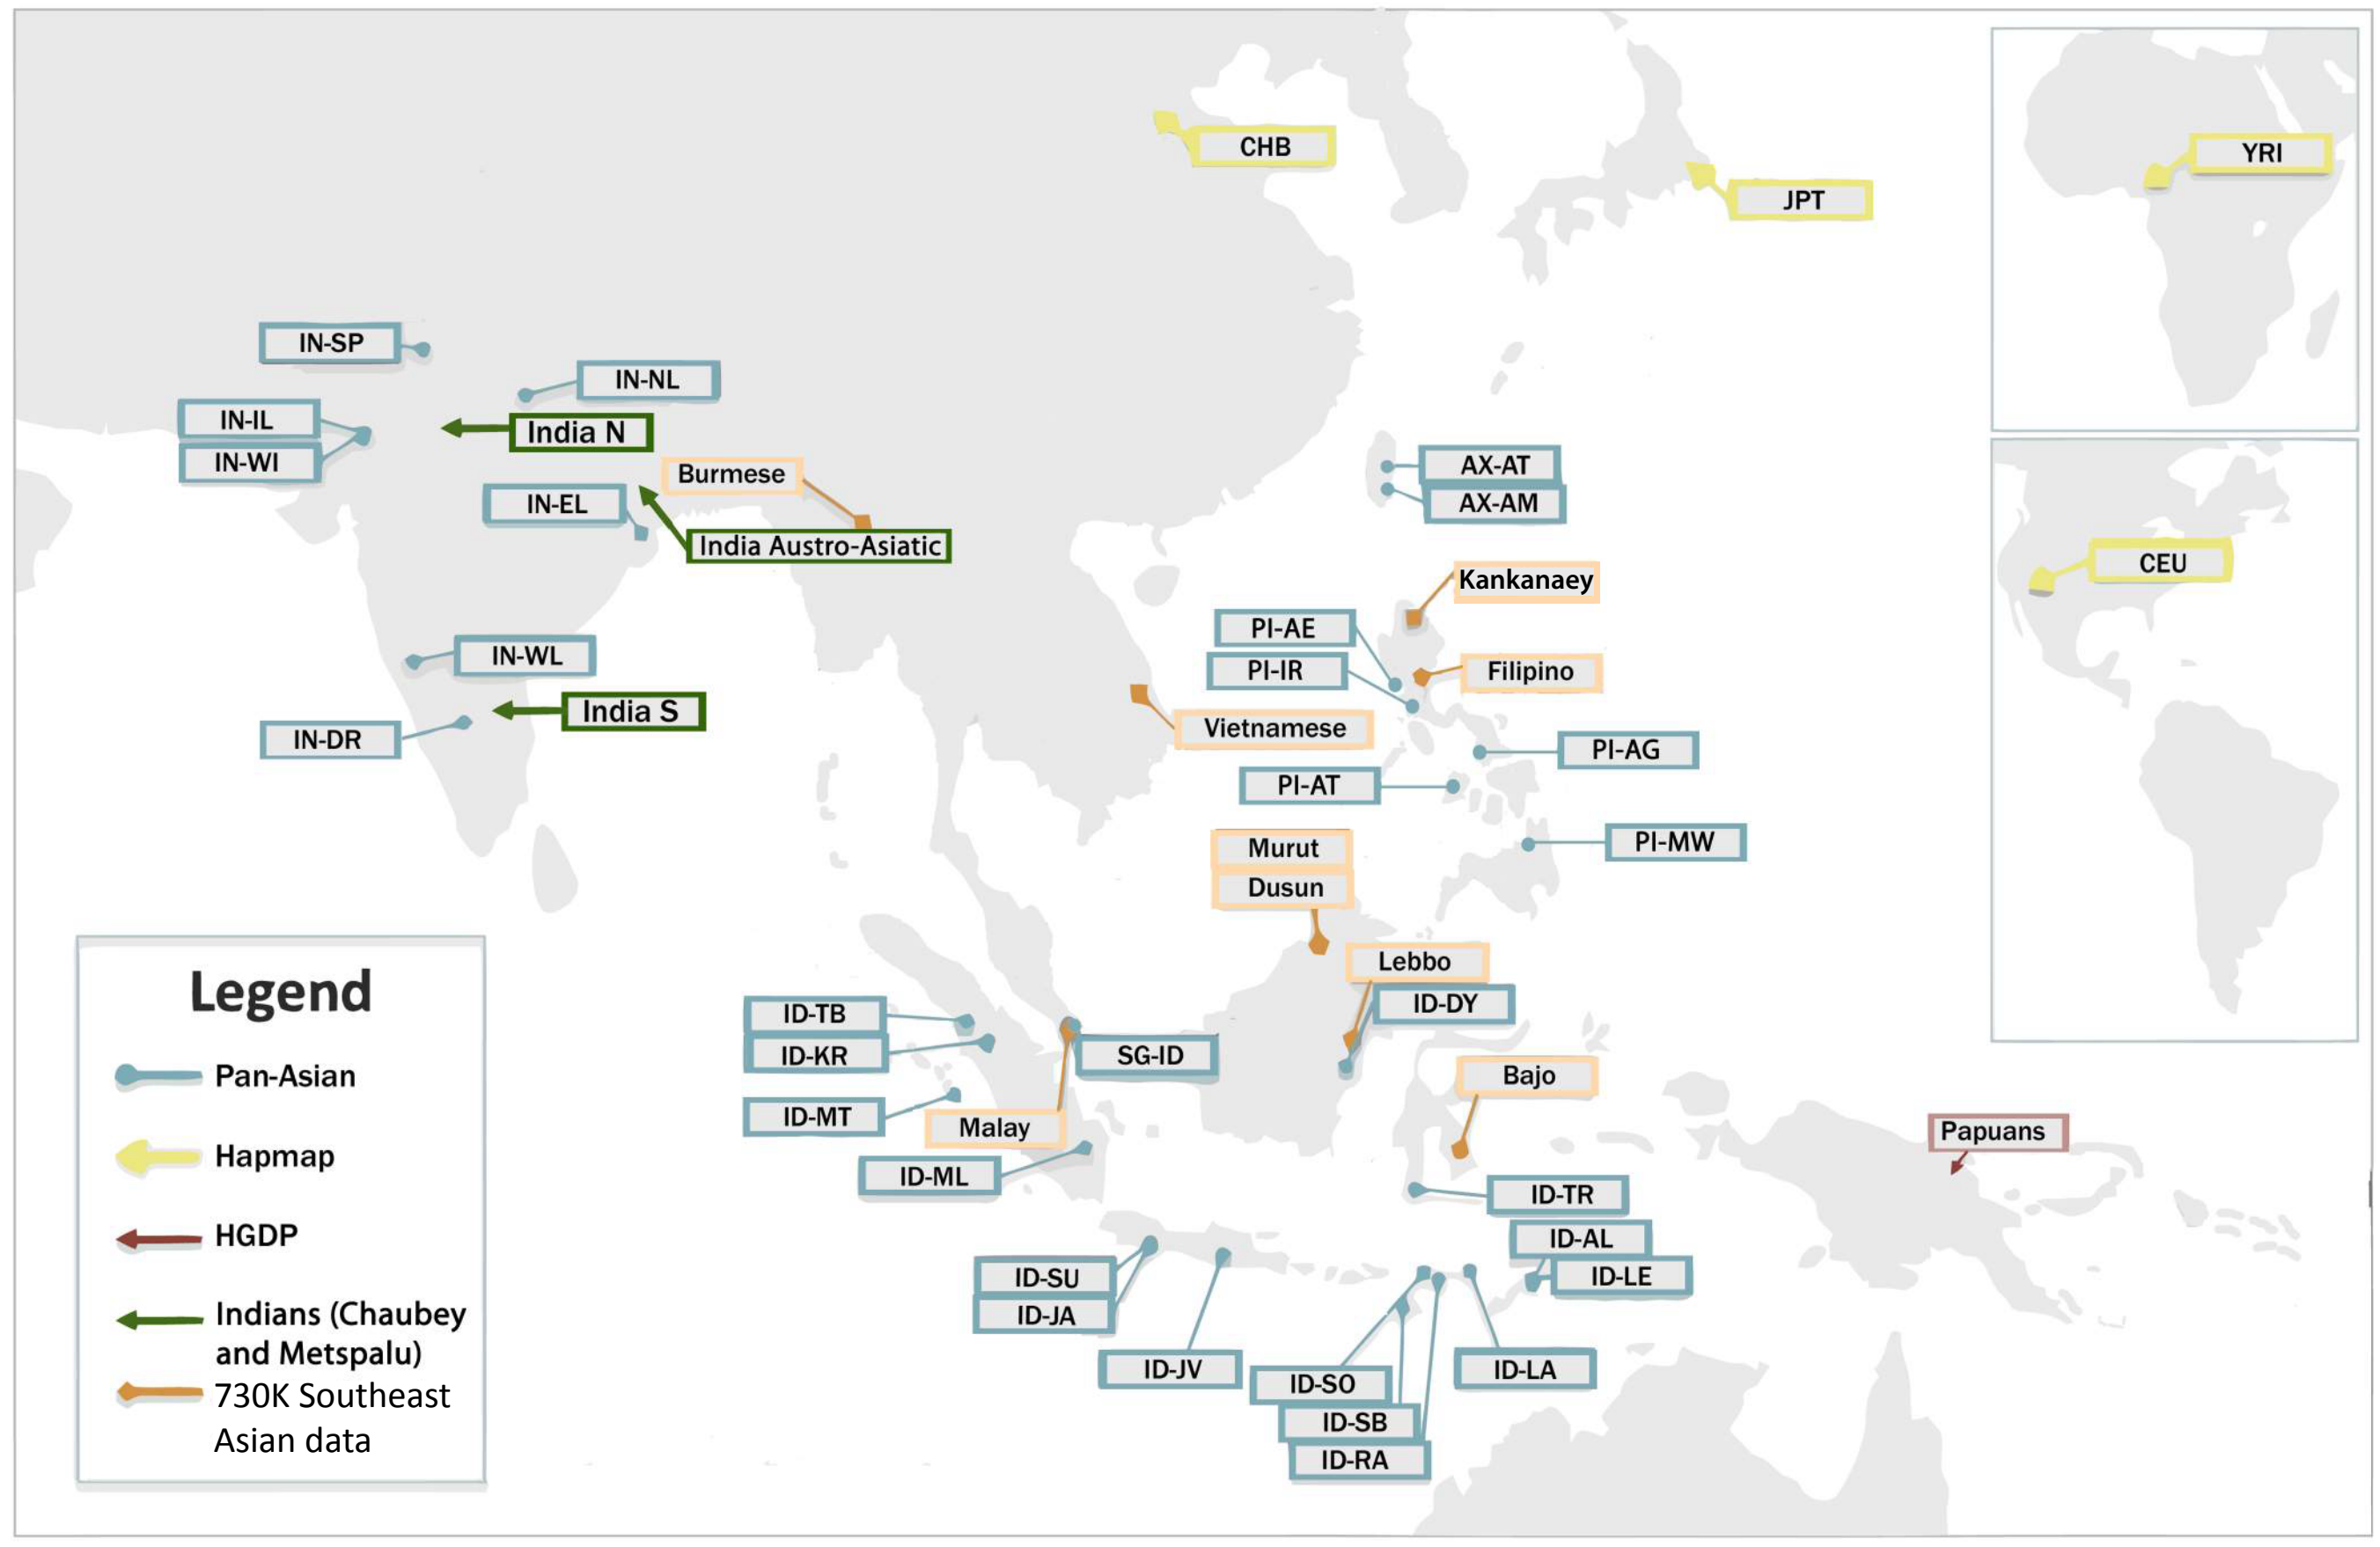

### Legend

-  Pan-Asian
-  Hapmap
-  HGDP
-  Indians (Chaubey and Metspalu)
-  730K Southeast Asian data

Supplement: ejhg201660x4.pdf [file ejhg201660x4.pdf]

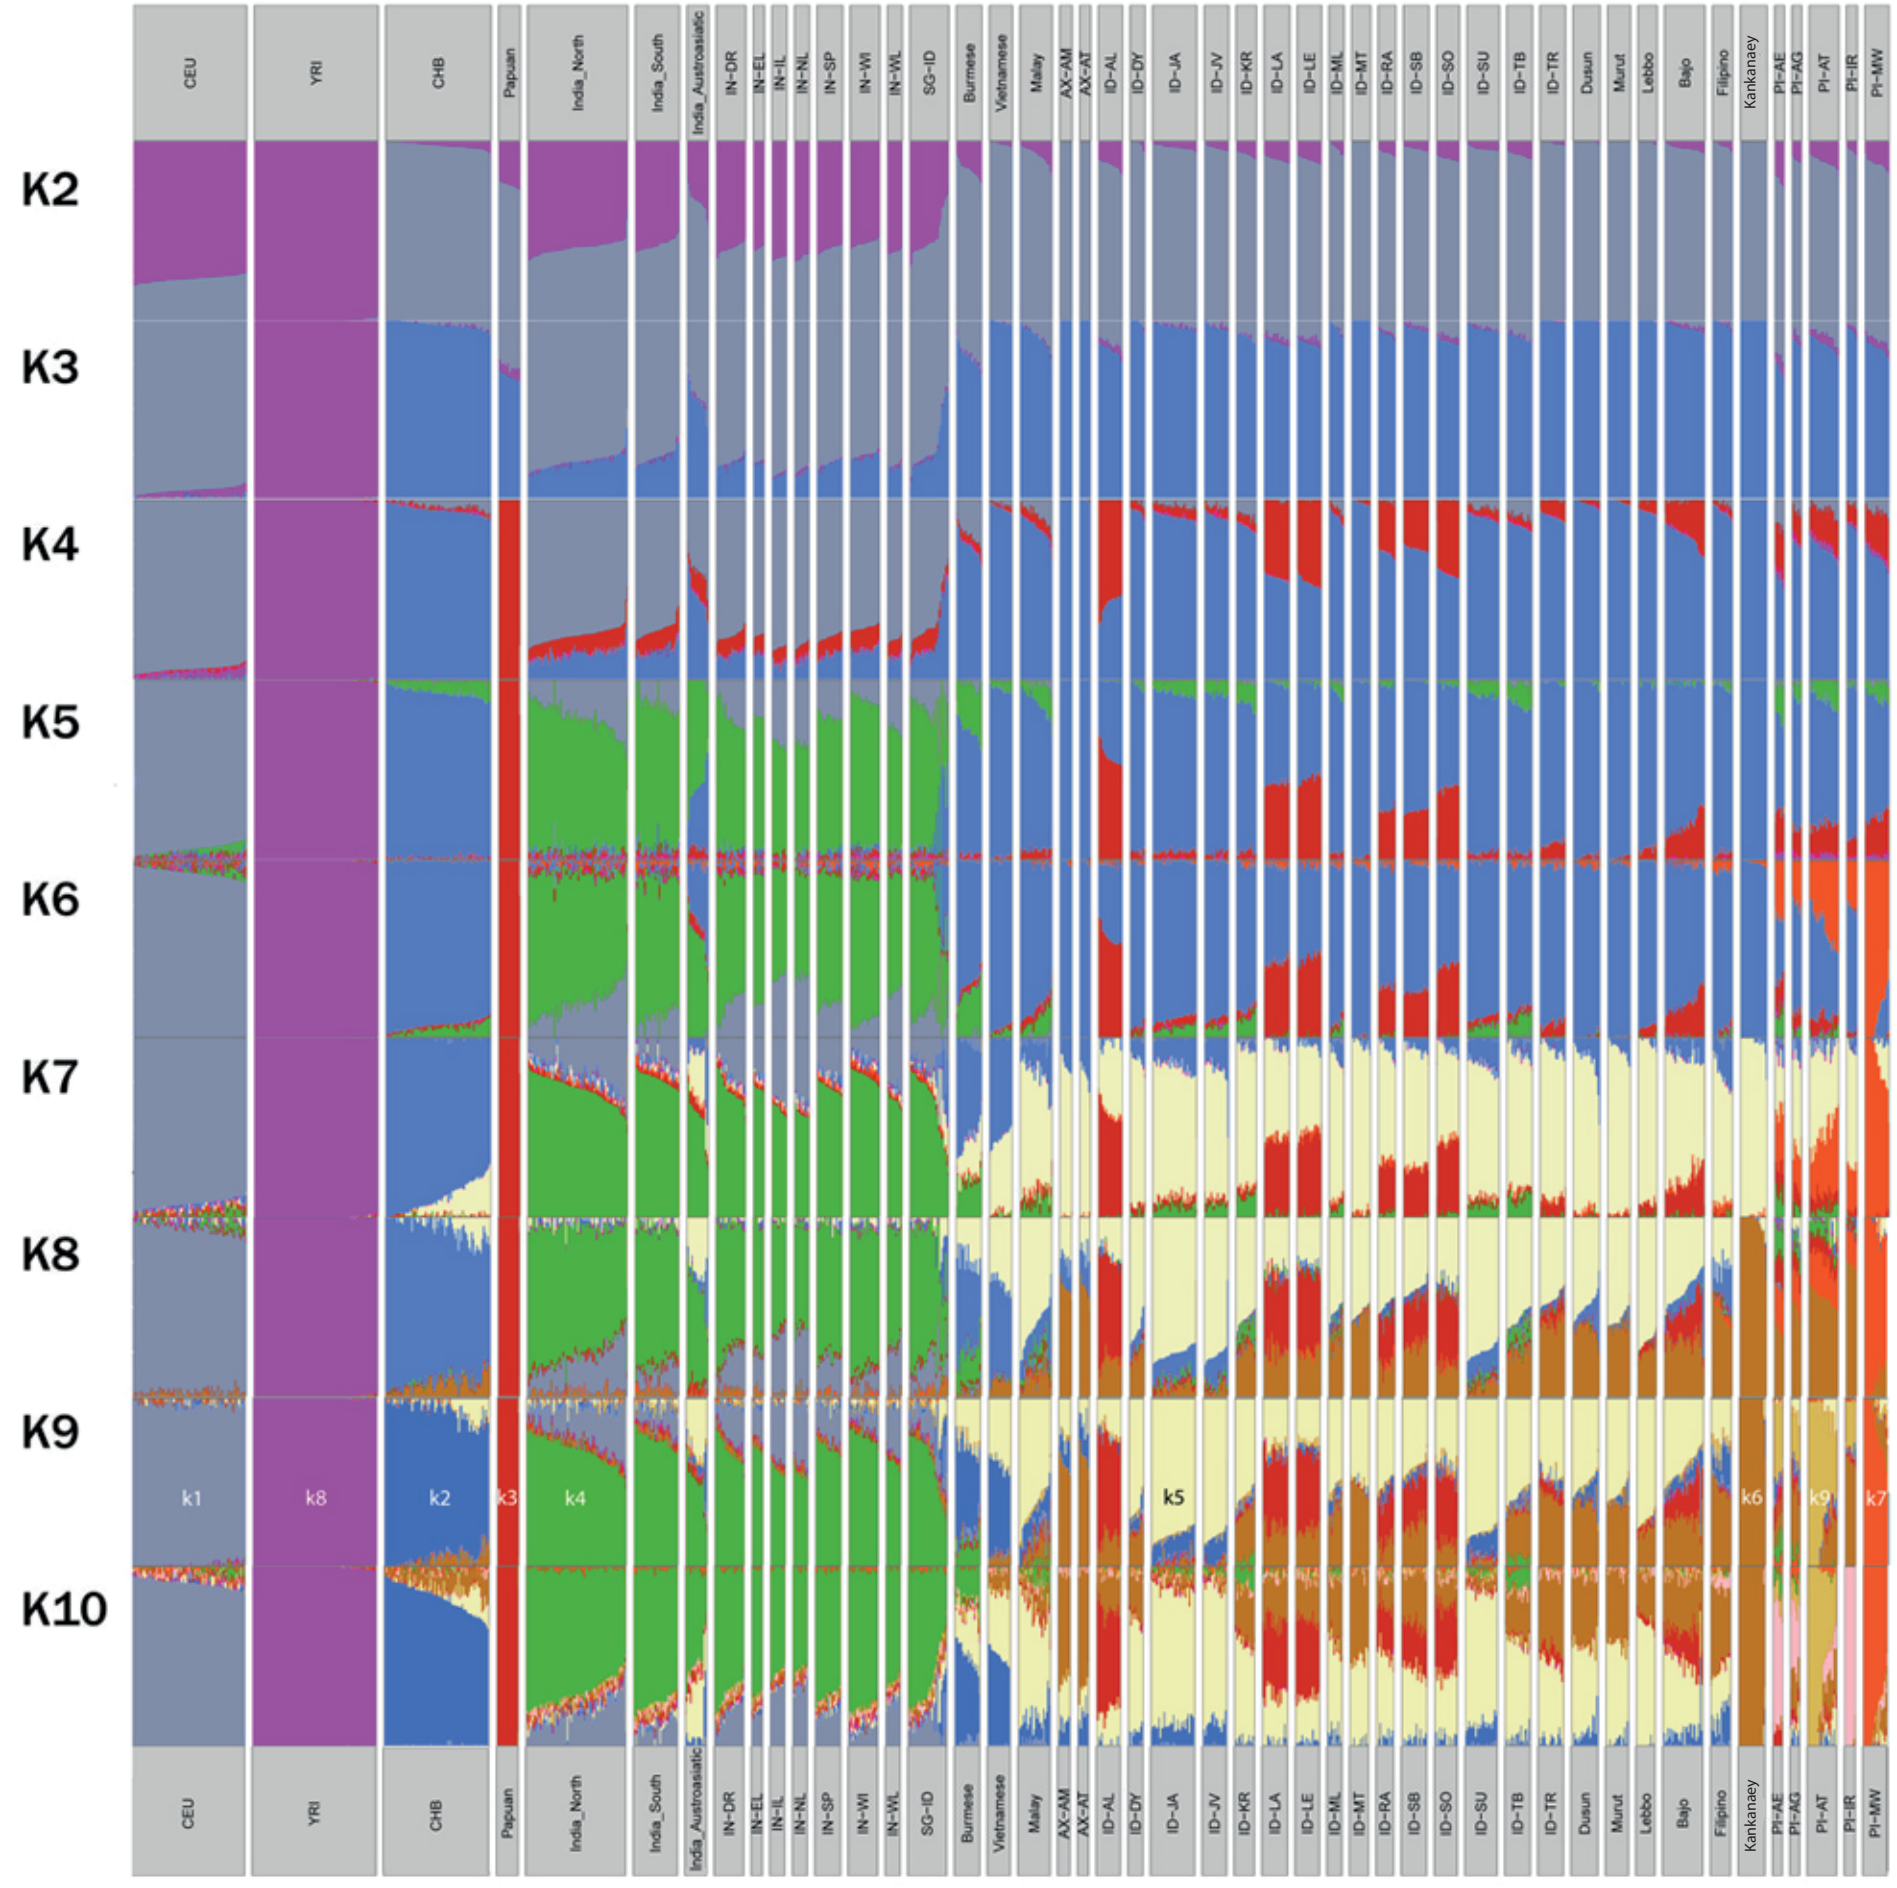

Supplement: ejhg201660x5.pdf [file ejhg201660x5.pdf]

# CV index, from K=6 to K=14

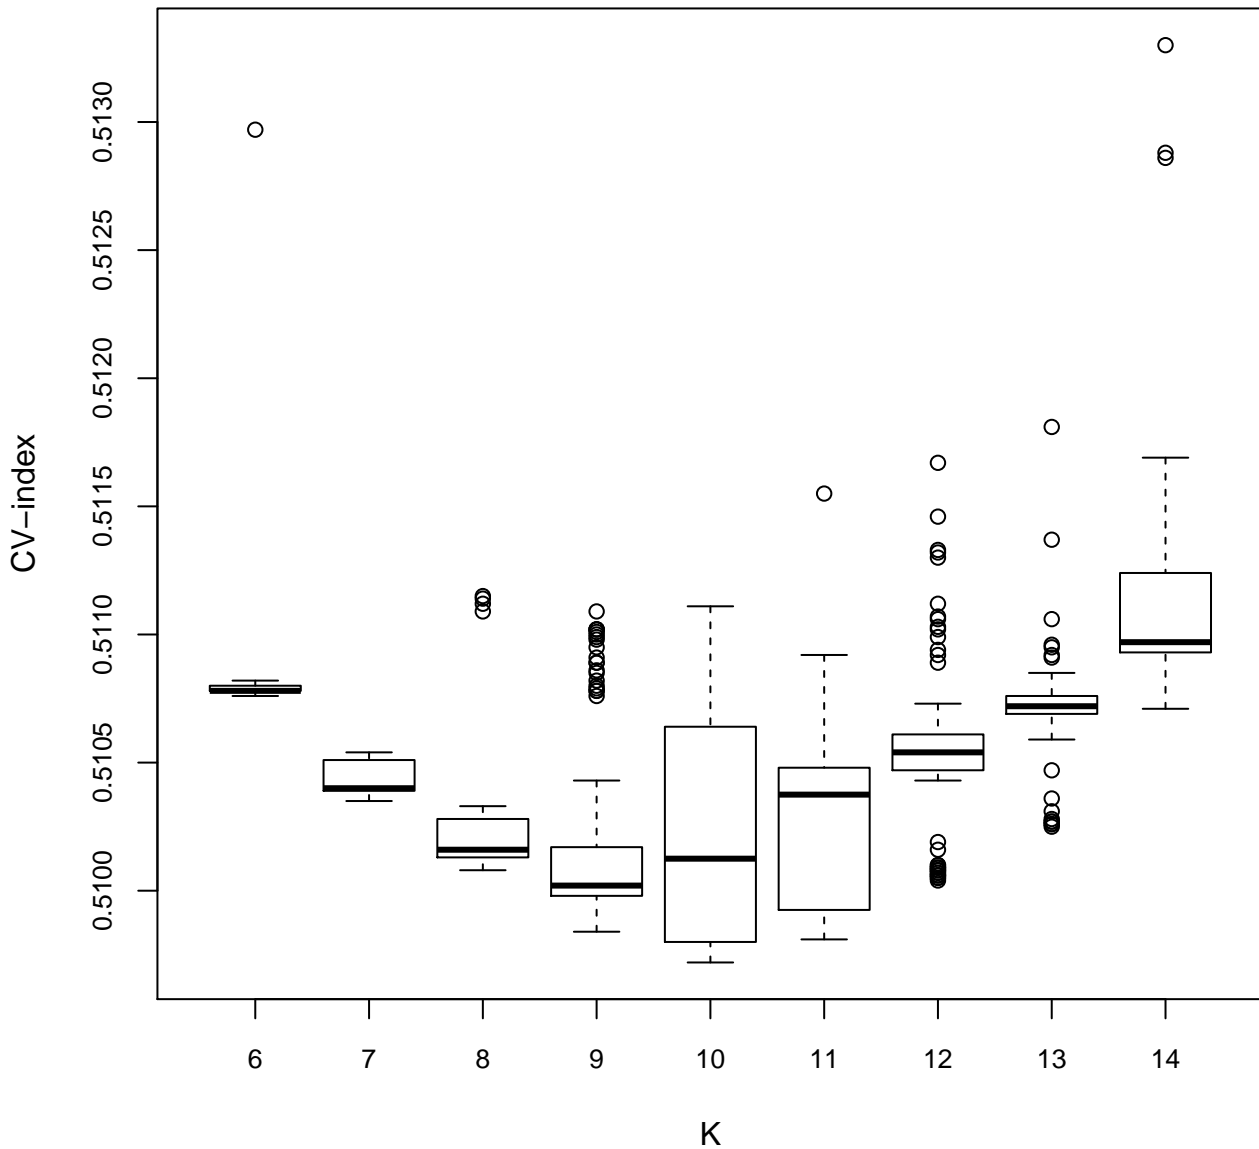

Admixture: best runs of 100 replicates at K3-15

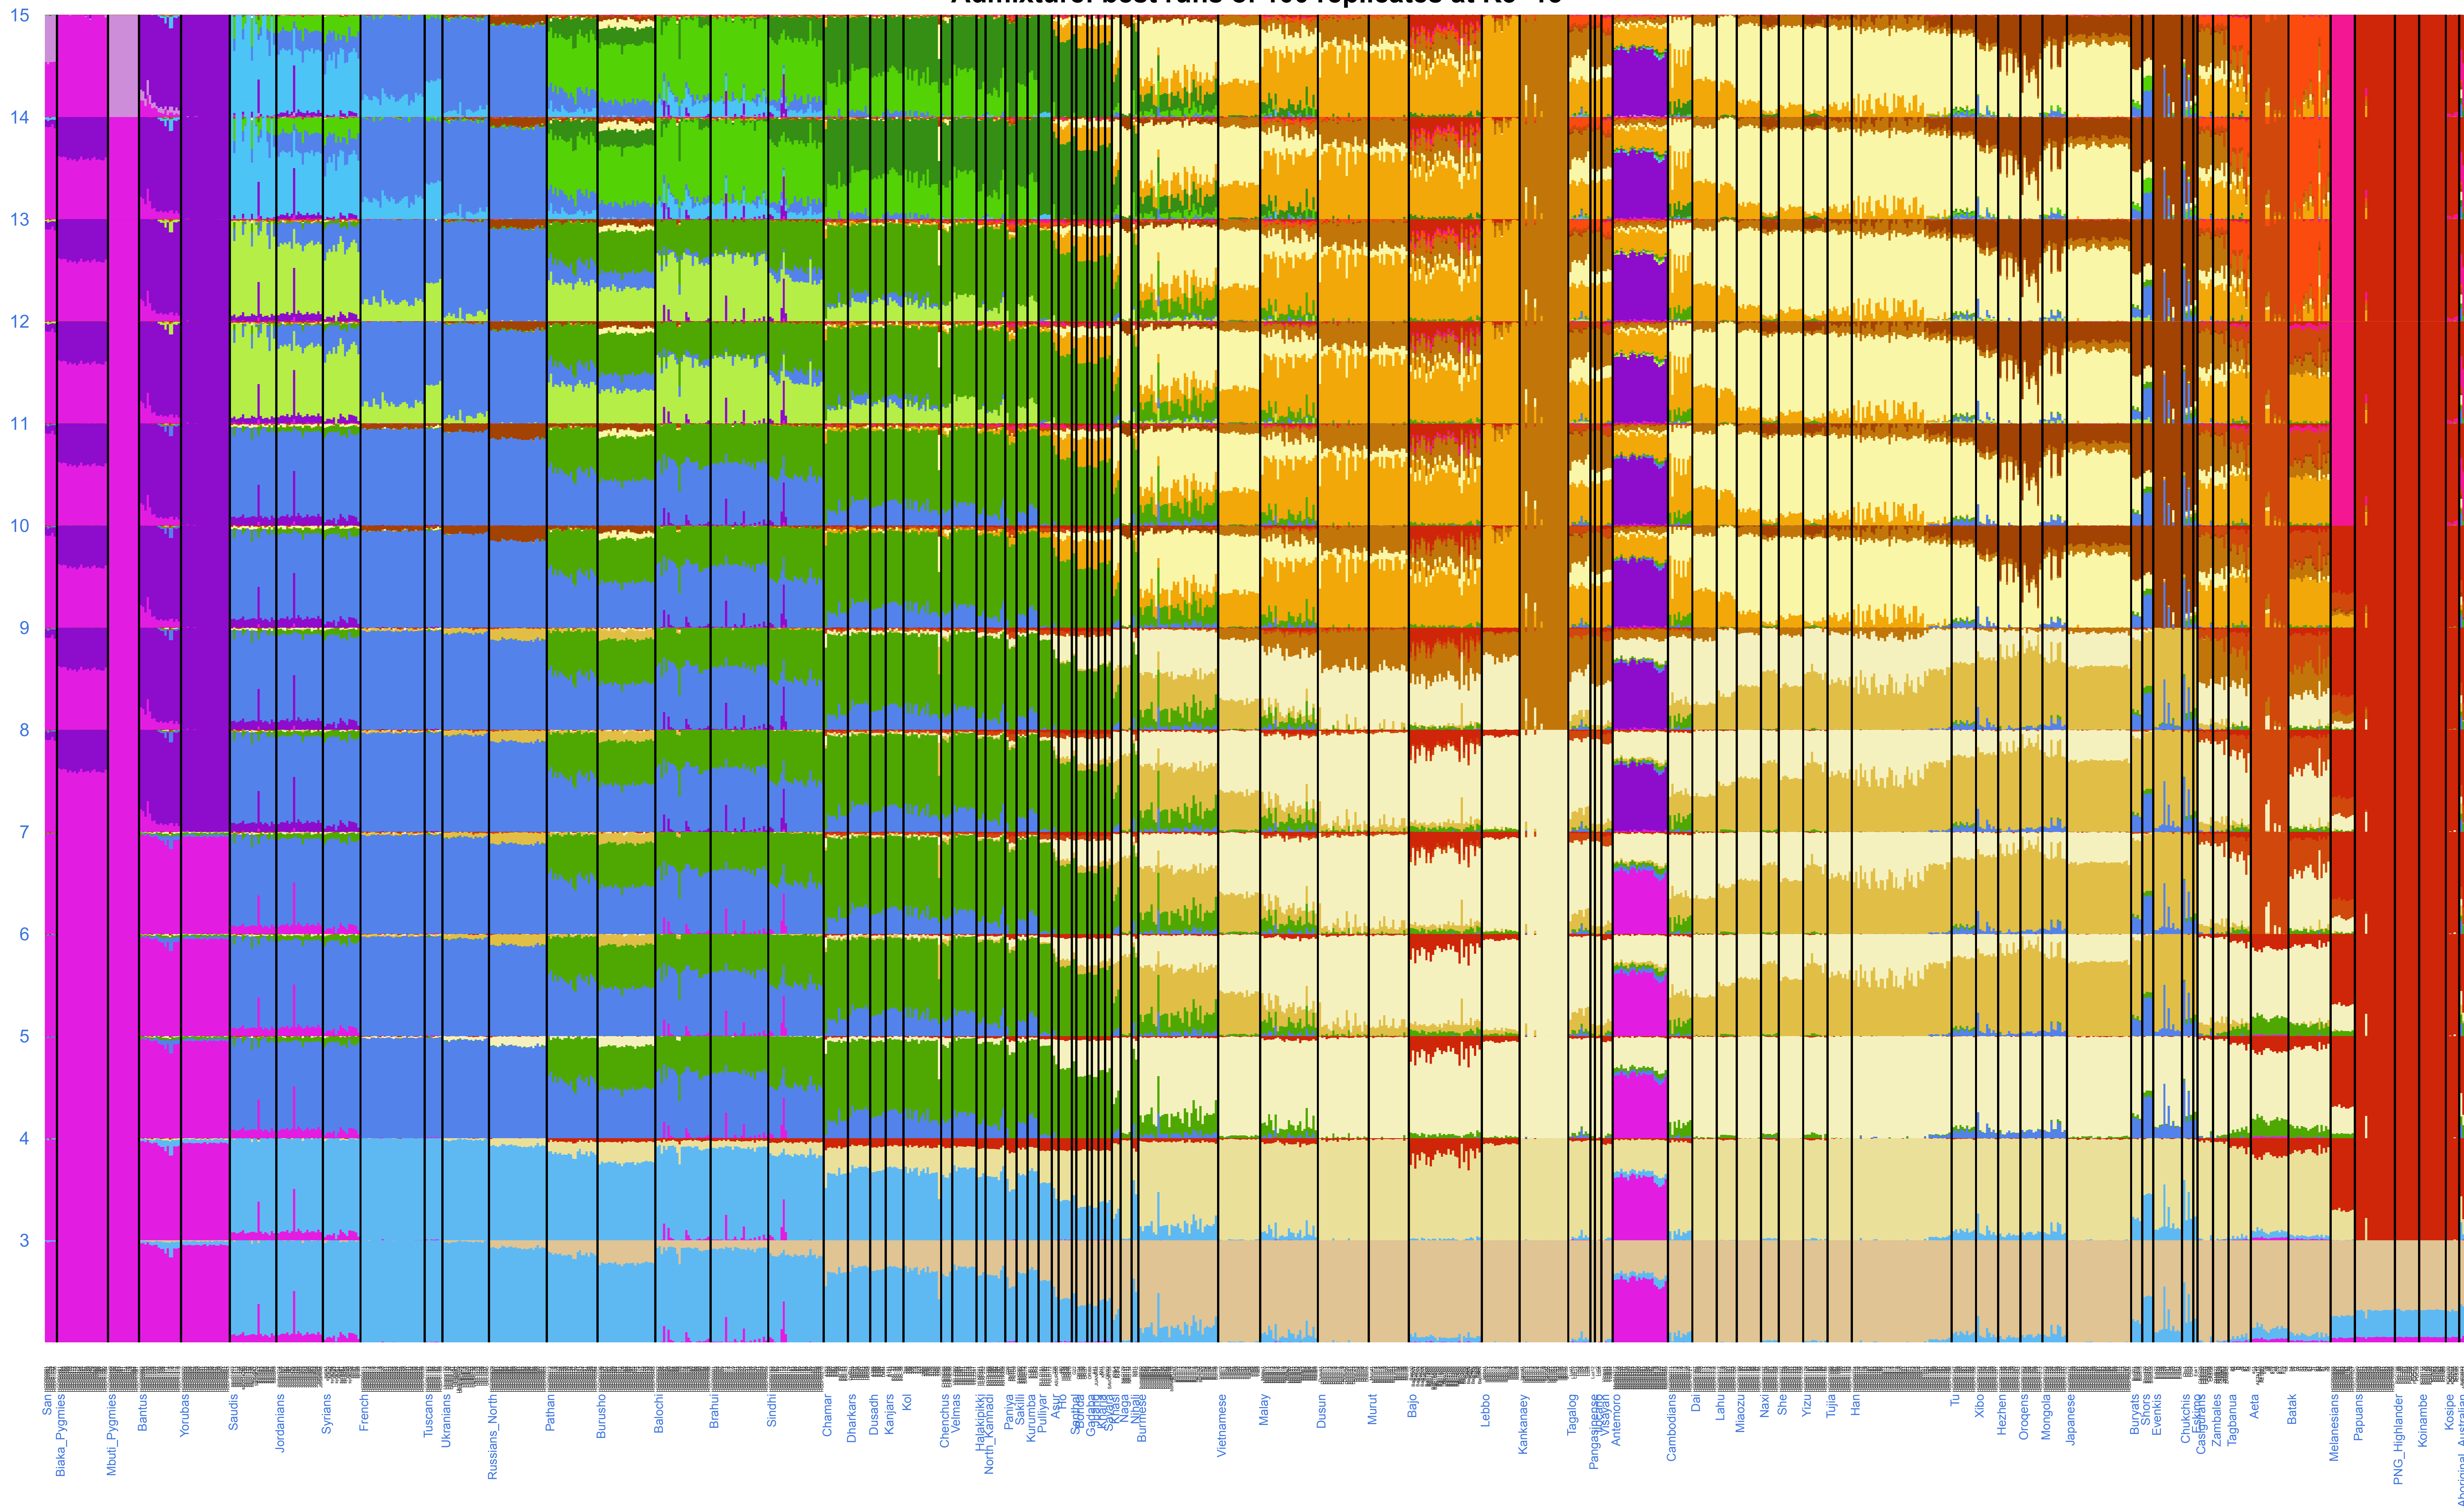

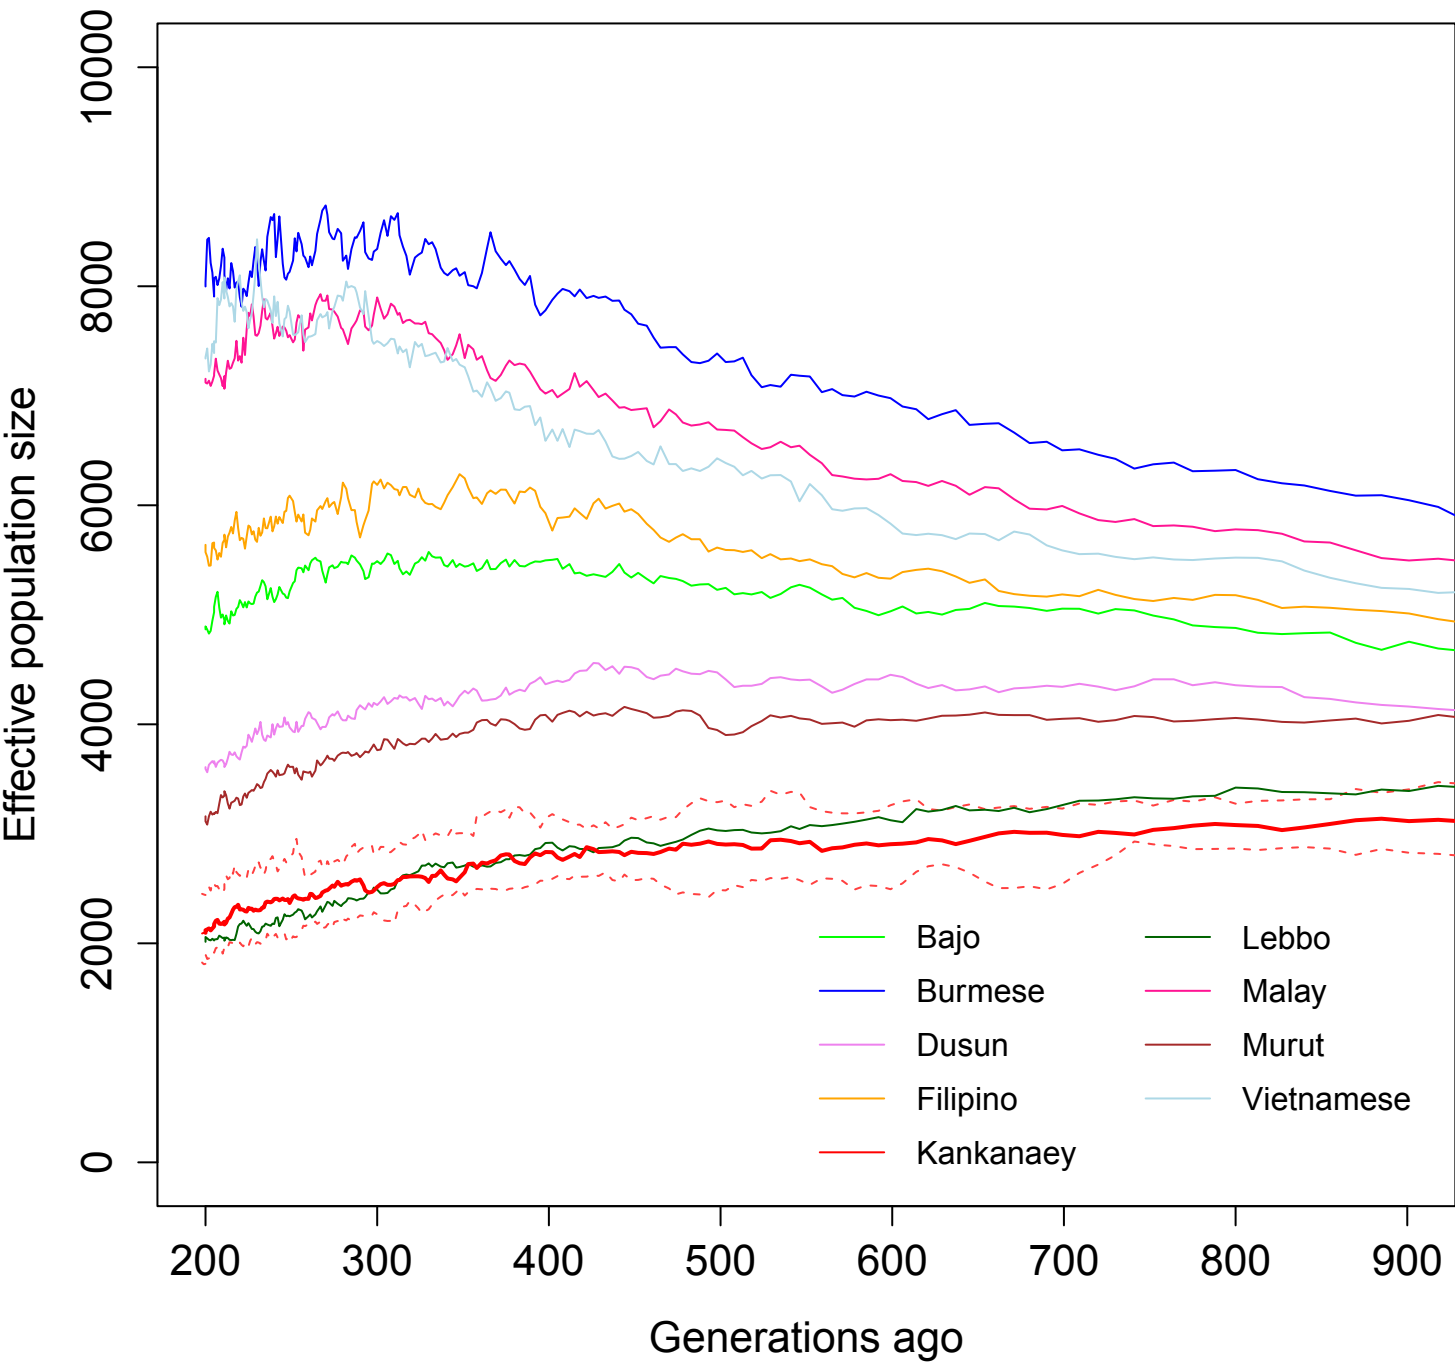

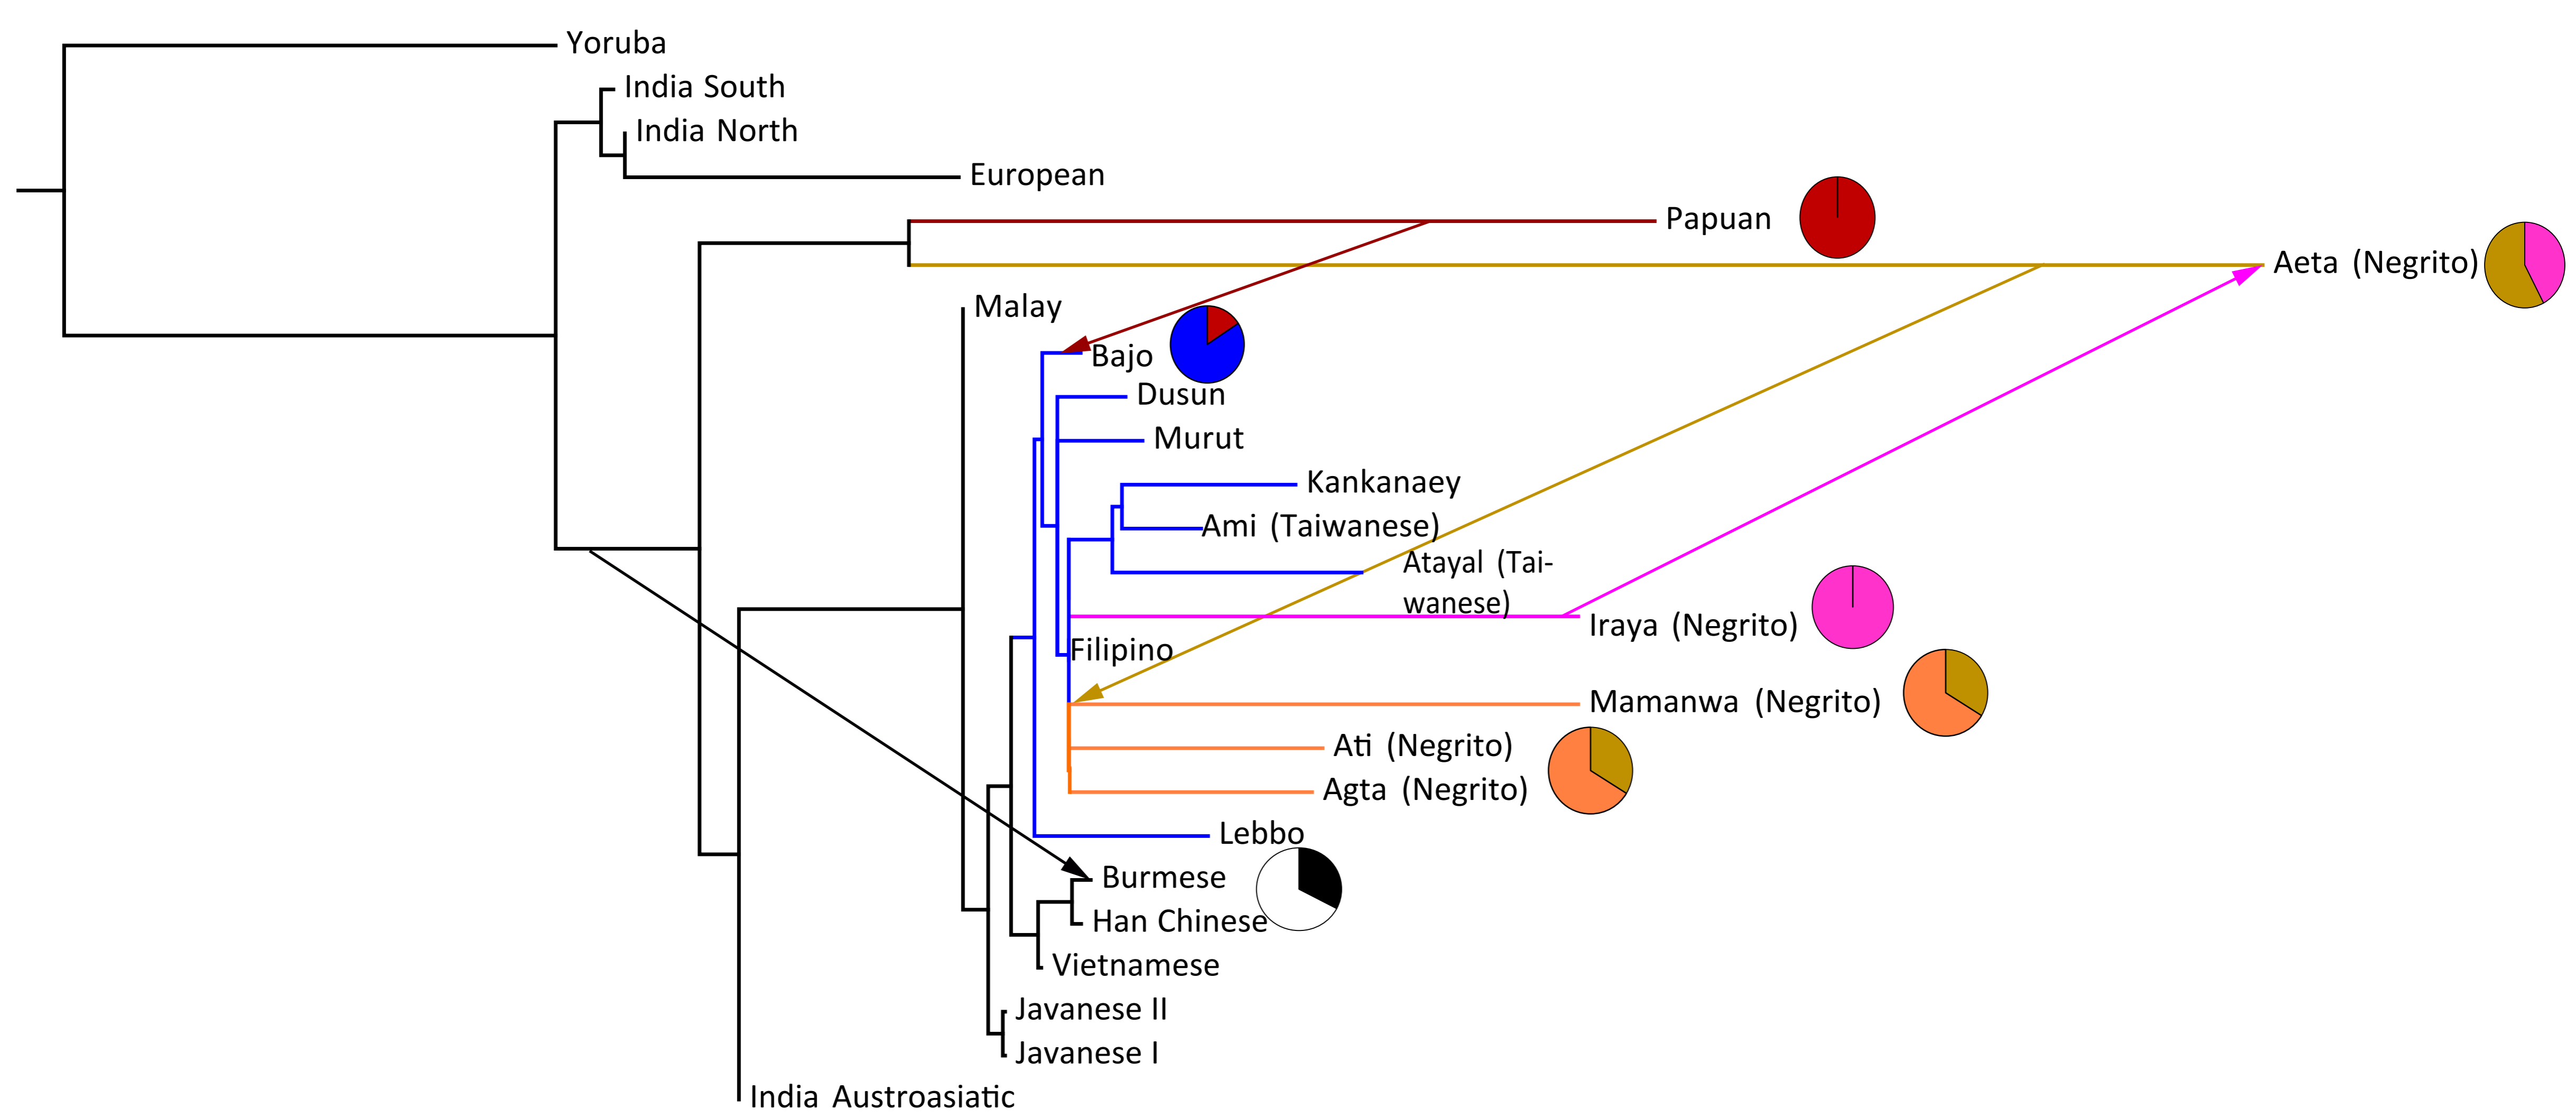

**explained variance,from N=0 to N=15**

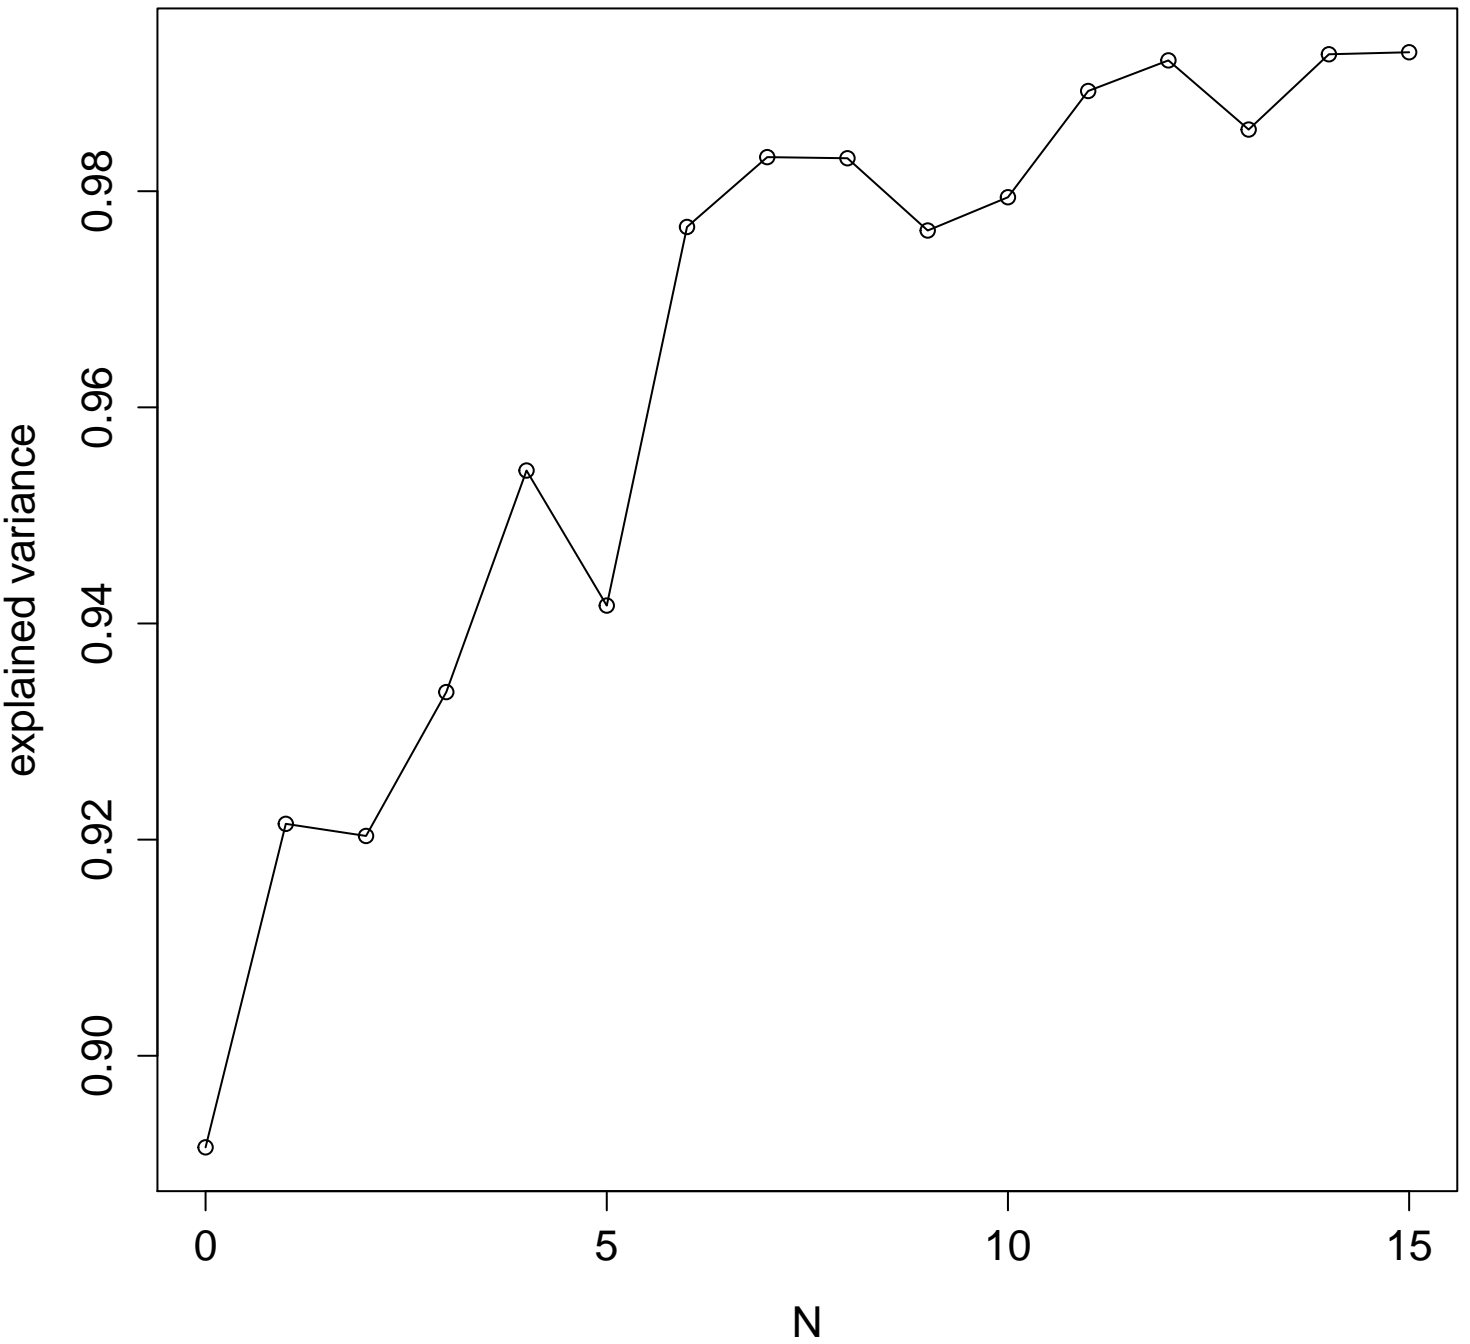

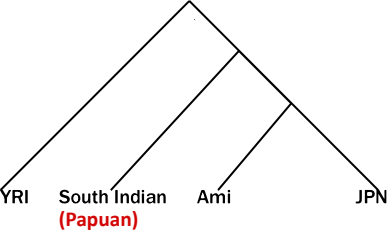

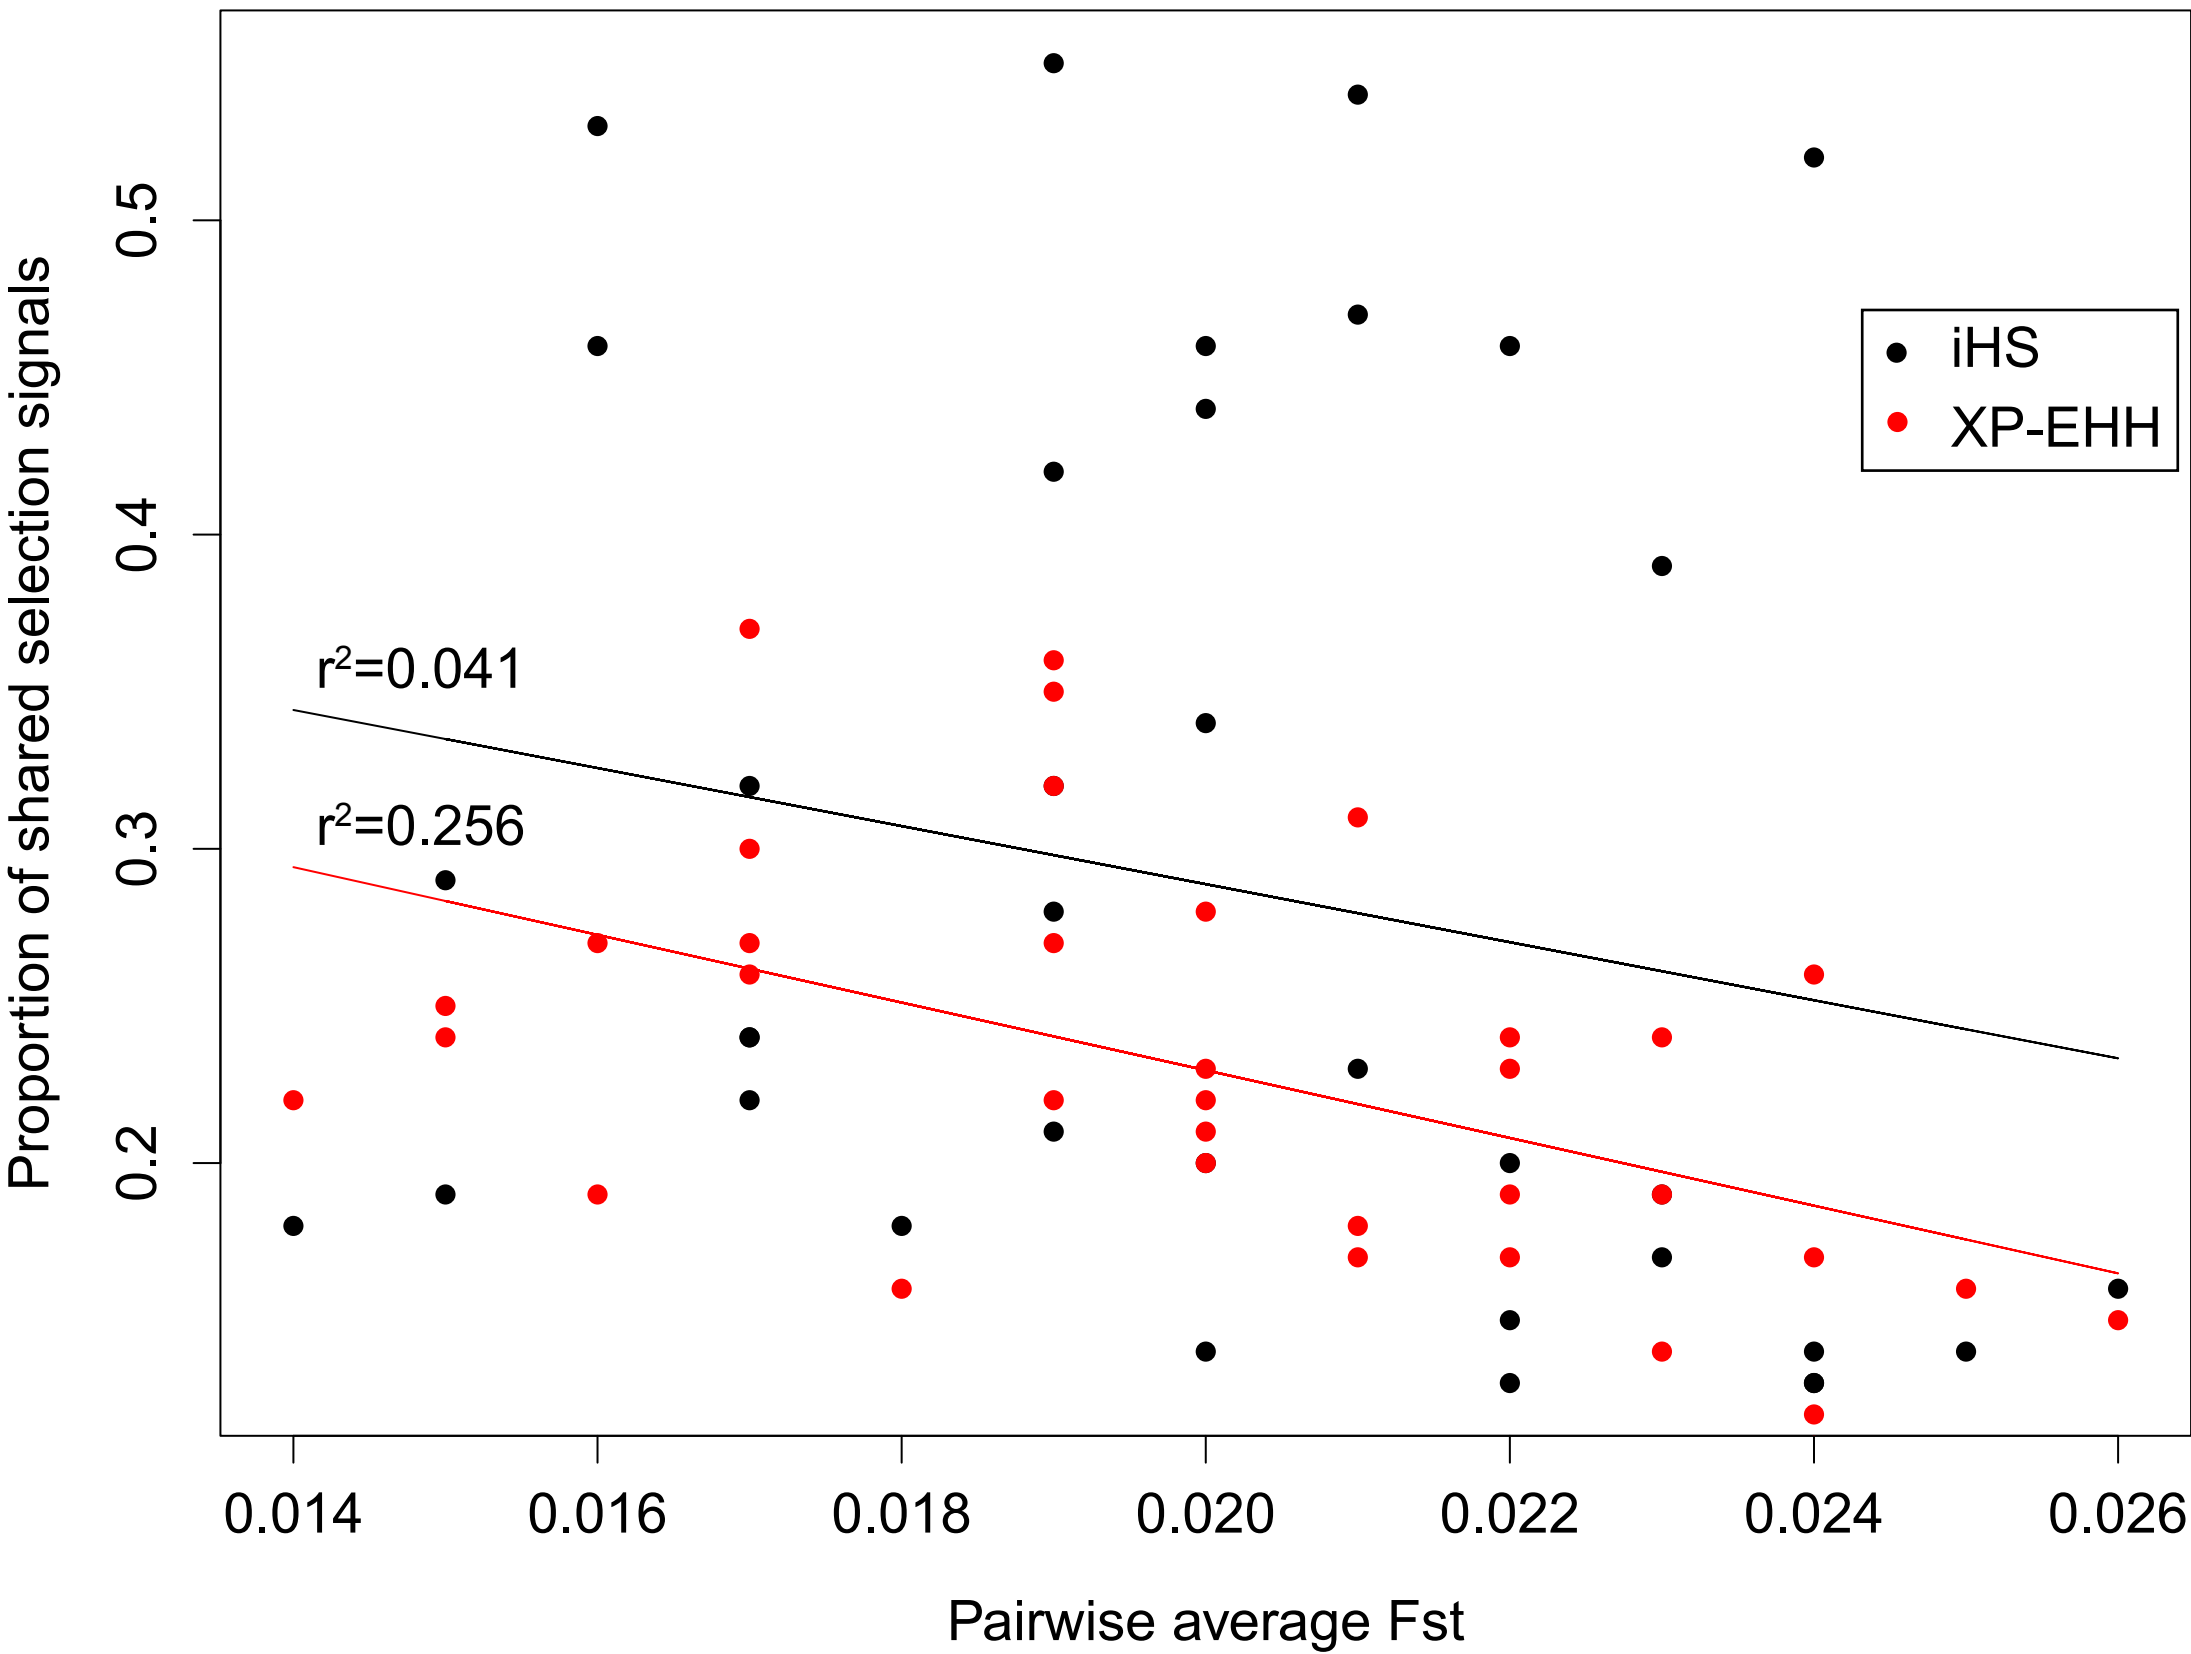

Supplement: ejhg201660x6.pdf [file ejhg201660x6.pdf]
